# Supplementary material for: Endogenous DAF-16 spatiotemporal activity quantitatively predicts lifespan extension induced by dietary restriction
Source: PubMed Central journal article supplement (PMC9941123; doi:10.1038/s42003-023-04562-2), 2023-02-20
Supplement: 42003_2023_4562_MOESM1_ESM.pdf [file 42003_2023_4562_MOESM1_ESM.pdf]

# Endogenous DAF-16 Spatiotemporal Activity Quantitatively Predicts Lifespan Extension Induced by Dietary Restriction

Javier Huayta<sup>1</sup>, Joseph P. Crapster, and Adriana San-Miguel<sup>1,\*</sup>

## SUPPLEMENTARY FIGURES AND TABLES

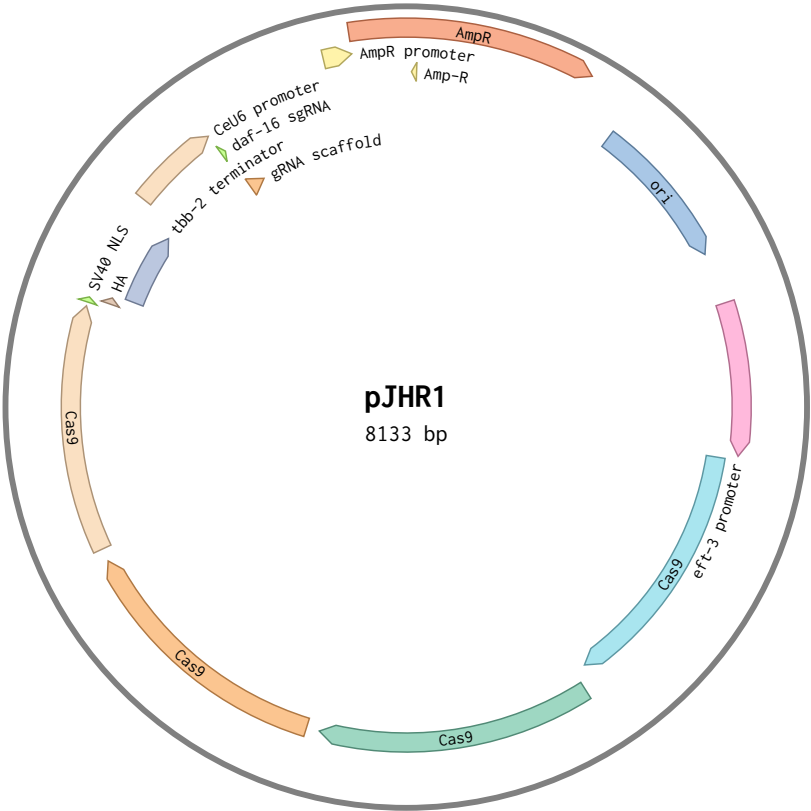

**Figure S1: Plasmid used for generation of transgenic strain with CRISP/Cas9.** pJHR1 contains the sgRNA targeting DAF-16 endogenous locus.

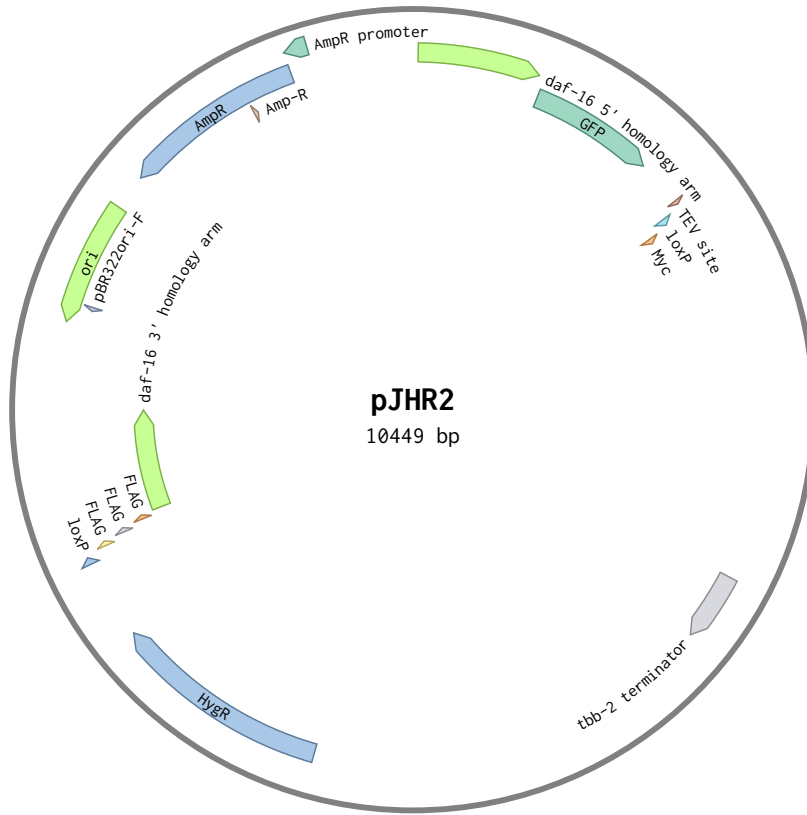

**Figure S2: Plasmid used for generation of transgenic strain with CRISPR/Cas9.** pJHR2 contains GFP, self-excising cassette, and homology arms for DAF-16 tagging.

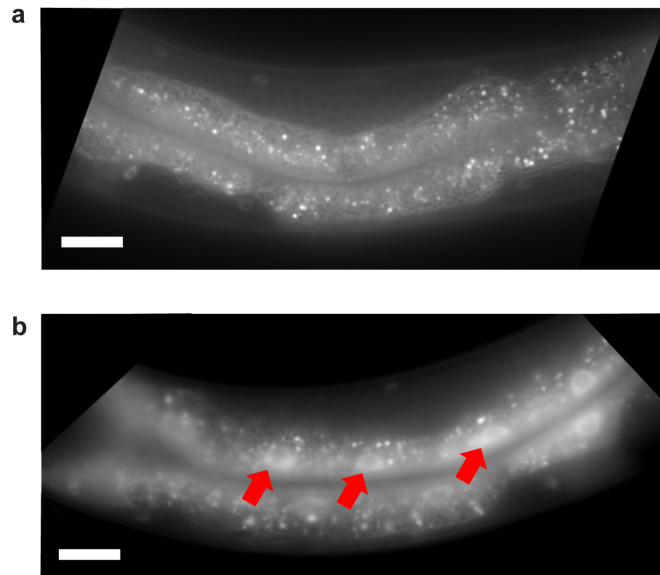

**Figure S3: DAF-16 localizes to nuclei in liquid culture.** A) Intestine of a young adult animal grown on solid media. B) DAF-16 localized in intestinal cell nuclei of young adult animals 3 hours after being transferred from solid media to liquid culture (red arrows). Scale bars are 20  $\mu$ M.

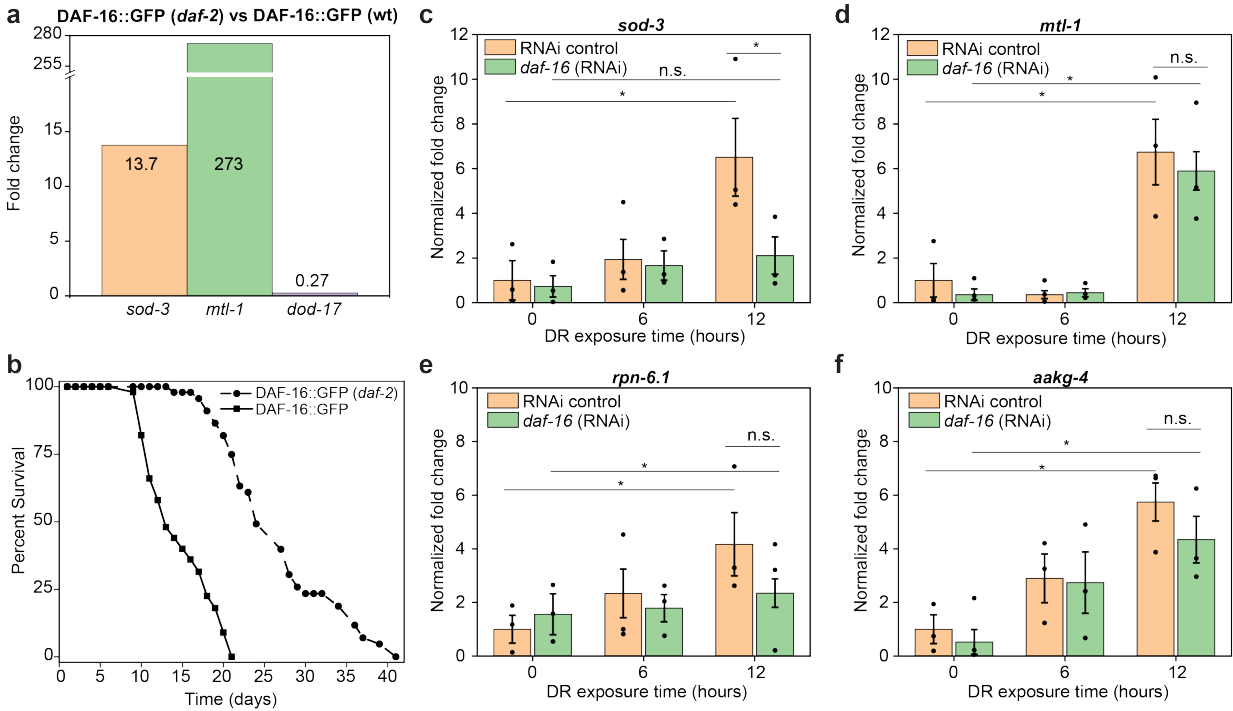

**Figure S4: DAF-16::GFP is functional and DAF-16 target genes increase under DR.** A) Constitutive activation of DAF-16::GFP through a *daf-2* (*e1370*) mutation induces *sod-3* and *mtl-1*, and inhibits *dod-17*. B) DAF-16::GFP with a *daf-2* (*e1370*) mutation live longer. C-F) Normalized fold change for *sod-3*, *mtl-1*, *rpn-6.1*, and *aakg-4* under a food concentration of  $10^8$  HT115 cells/ml for 6 and 12 hours. Error bars are SEM.  $p > 0.05$  (n.s.),  $p < 0.05$  (\*). All p-values were calculated using Tukey HSD for all pairwise comparisons after one-way ANOVA (unequal variances) comparison.

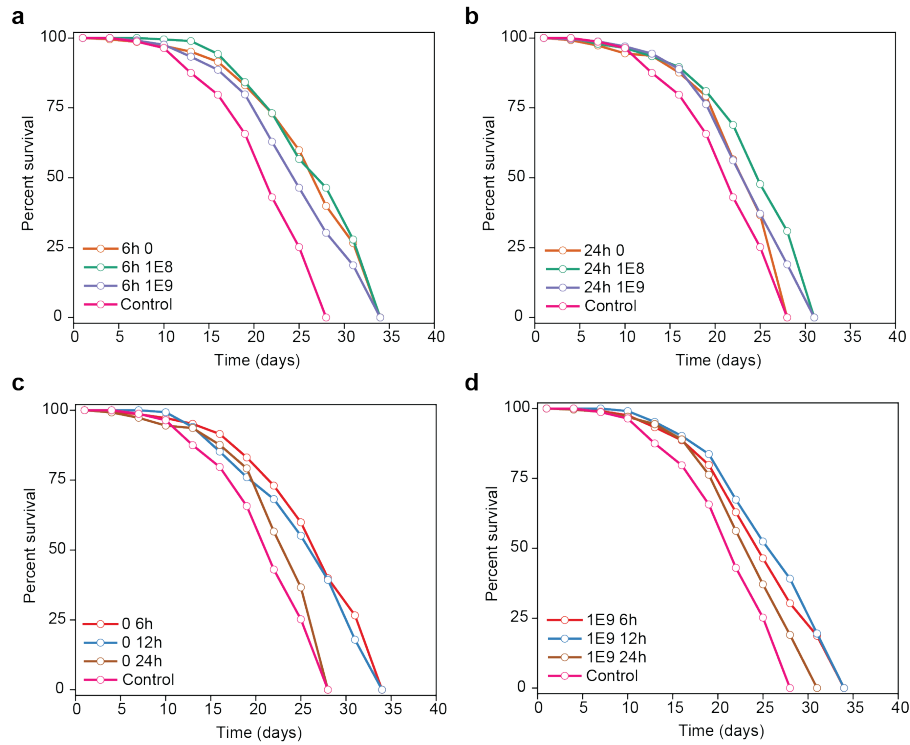

**Figure S5: Lifespan curves for various DR regimes.** A) Varying food concentration with 6 hours exposure time. B) Varying food concentration with 24 hours exposure time. C) Varying exposure time with a food concentration of 0 OP50 cells/ml. D) Varying exposure time with a food concentration of  $10^9$  OP50 cells/ml.

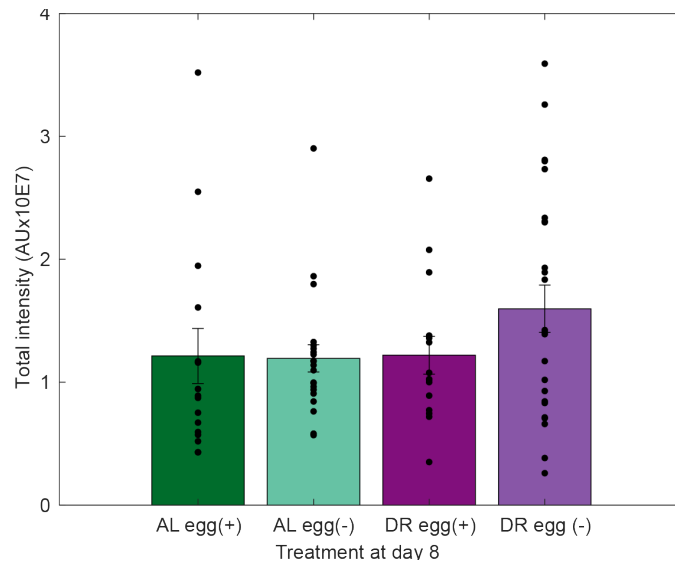

**Figure S6: DR induces DAF-16 nuclear localization before egg laying stops.** Adult animals (Day 8) exposed to *ad libitum* (AL) food show no difference in DAF-16 nuclear localization regardless of presence of eggs. Adult animals (Day 8) with eggs under 6 hour DR (no food) show increased DAF-16 nuclear localization compared to animals without embryos under the same DR conditions. Error bars are SEM.  $p < 0.05$  (\*). All p-values were calculated using Tukey HSD for all pairwise comparisons after one-way ANOVA (unequal variances) comparison.

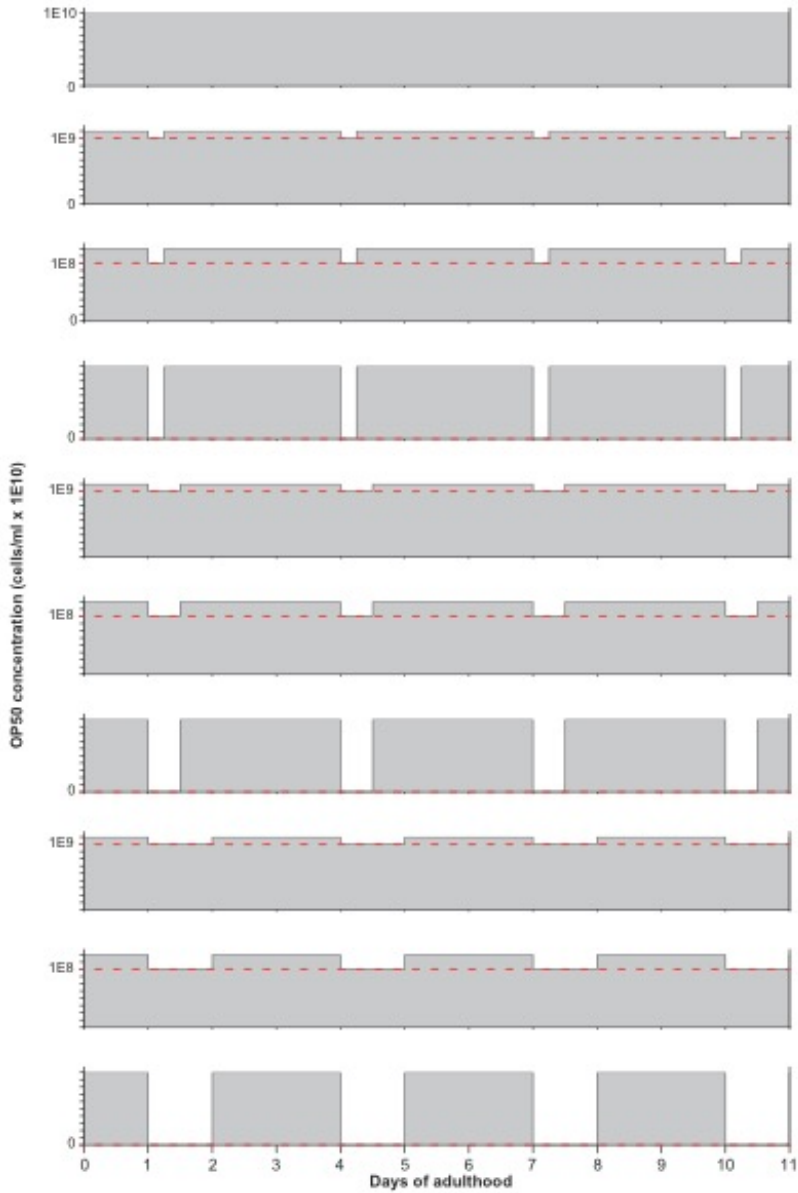

**Figure S7: Graphic representation of food availability for each of the DR regimes evaluated.** Grey areas were calculated for each DR regime and used in Figure 3F.

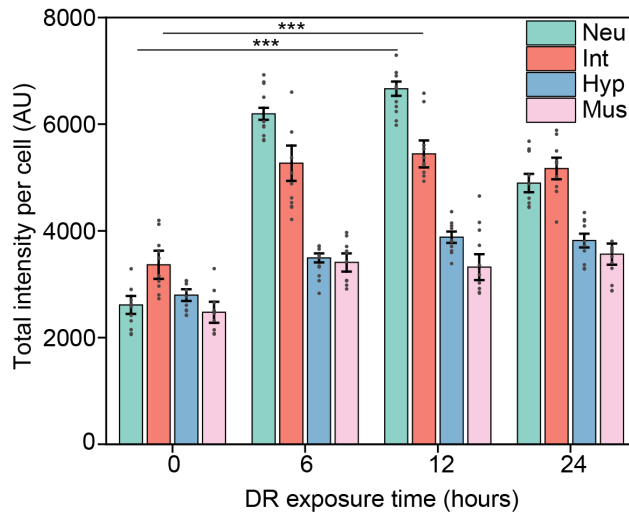

**Figure S8: Mean intensity per cell type at various exposure times.** Intestinal cells and neurons show the largest mean intensity compared to other cell types. Error bars are SEM.  $p < 0.001$  (\*\*\*) . All p-values were calculated using Tukey HSD for all pairwise comparisons after one-way ANOVA (unequal variances) comparison.

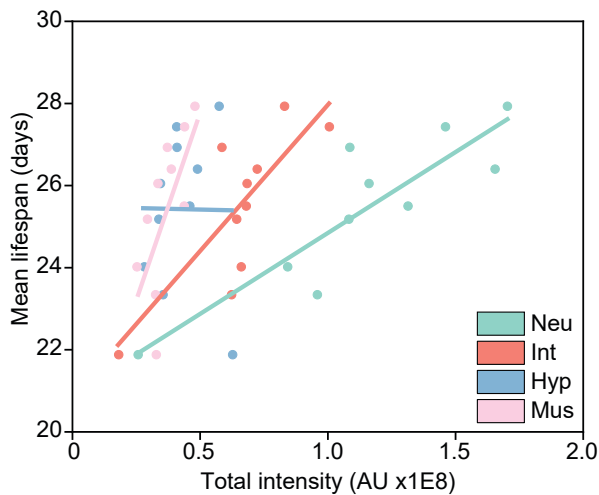

**Figure S9: Mean lifespan dependence on total intensity by cell type.** Linear regression analysis of mean lifespan under DR as a function of DAF-16 total nuclear intensity in specific cell types indicates that the best correlation corresponds to neurons ( $R^2 = 0.78$ ) and intestinal cells ( $R^2 = 0.64$ ) with minor or negligible contributions from hypodermal ( $R^2 = 0.47$ ) and muscle cells ( $R^2 = 0.00$ ). Linear fits were performed in Origin 2020b.



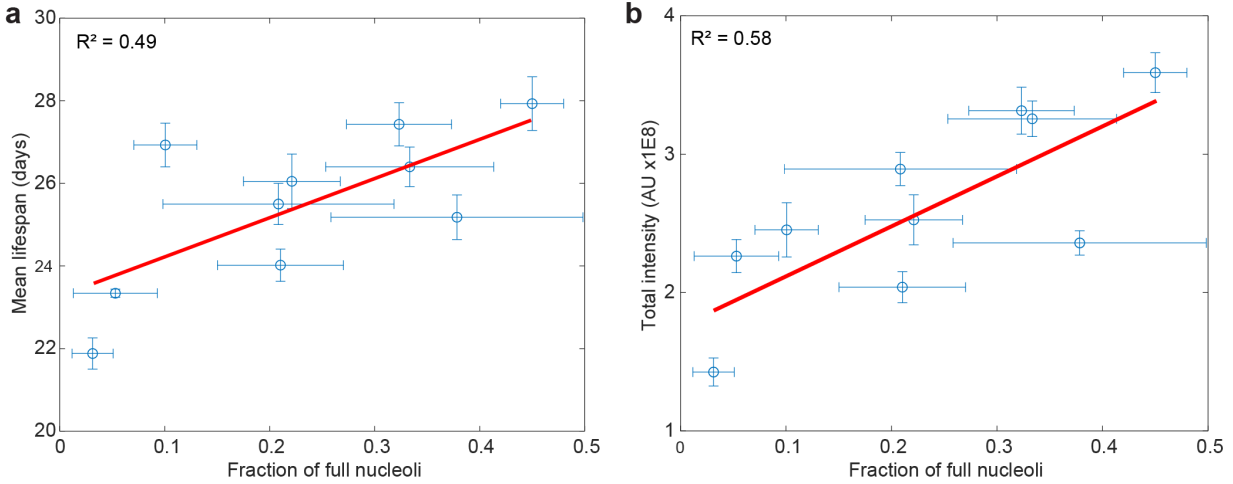

**Figure S10: Mean lifespan and DAF-16 total intensity as a function of full nucleoli.** A) Linear regression analysis of mean lifespan as a function of full intestinal nucleoli shows a trend with  $R^2 = 0.49$ . B) Linear regression analysis of DAF-16 total intensity as a function of full intestinal nucleoli shows a directly proportional trend with  $R^2 = 0.58$ . Linear fits were performed in Origin 2020b.

**Table S1: Primers used for generation of transgenic line ASM10 *daf-16* (del2 [*daf-16::GFP-C1*<sup>3xFlag</sup>])**

| Description                          | Primer                                                      |
|--------------------------------------|-------------------------------------------------------------|
| 3' forward homology arm in pDD282    | CGTGATTACAAGGATGACGATGACAAGAGA<br>TAAATTCTCTTCATTTTGTTC     |
| 3' reverse homology arm in pDD282    | GGAAACAGCTATGACCATGTTATCGATTTCG<br>GCTGTGATGATCGTTGAGTG     |
| 5' forward homology arm in pDD282    | ACGTTGTAAAACGACGGCCAGTCGCCGGCA<br>TACGGGCTCGATTTTCGTGA      |
| 5' reverse homology arm in pDD282    | CATCGATGCTCCTGAGGCTCCCGATGCTCCC<br>AAATCAAAATGAATATGCTGtCCT |
| sgRNA added to pDD162                | ATGAGCTGAGTCAAGCTGGA                                        |
| Forward to introduce sgRNA in pDD162 | ATGAGCTGAGTCAAGCTGGAGTTTTAGAGC<br>TAGAAATAGCAAGT            |
| Reverse to introduce sgRNA in pDD162 | CAAGACATCTCGCAATAGG                                         |
